# Supplementary material
Source: Springer Nature journal article supplement (https://www.springermedizin.de/resource/supplementary/12916_2013_1098_MOESM1_ESM.pdf/9598432)
Supplement: MOESM1 [file 9598432]

**GENETICS**

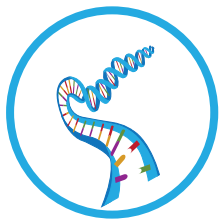

**EPIGENETICS**

**GENDER**

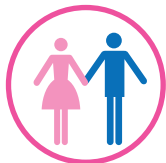

**Stochastic events**

**PATHOGENS**

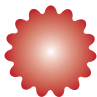

**ENVIRONMENT**  
Diet-Toxins-Tobacco

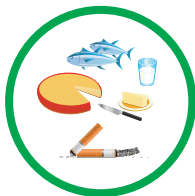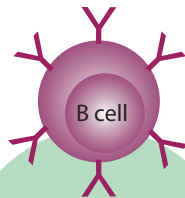

AUTOANTIBODIES  
CYTOKINE IMBALANCES

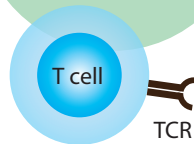

**AUTOIMMUNE  
DISEASE**

PHENOTYPE  
SUBPHENOTYPE  
POLYAUTOIMMUNITY

**HERITABLE  
FACTORS**

**AUTOIMMUNE  
ECOLOGY**

**PRECLINICAL  
STAGE**

**OVERT  
DISEASE**

**TIME**
